# Supplementary material
Source: MDPI journal article supplement (https://www.mdpi.com/2073-4441/13/4/535)
Supplement: s1 [file s1]

Supplementary material 2: Survey results graphs for each study site

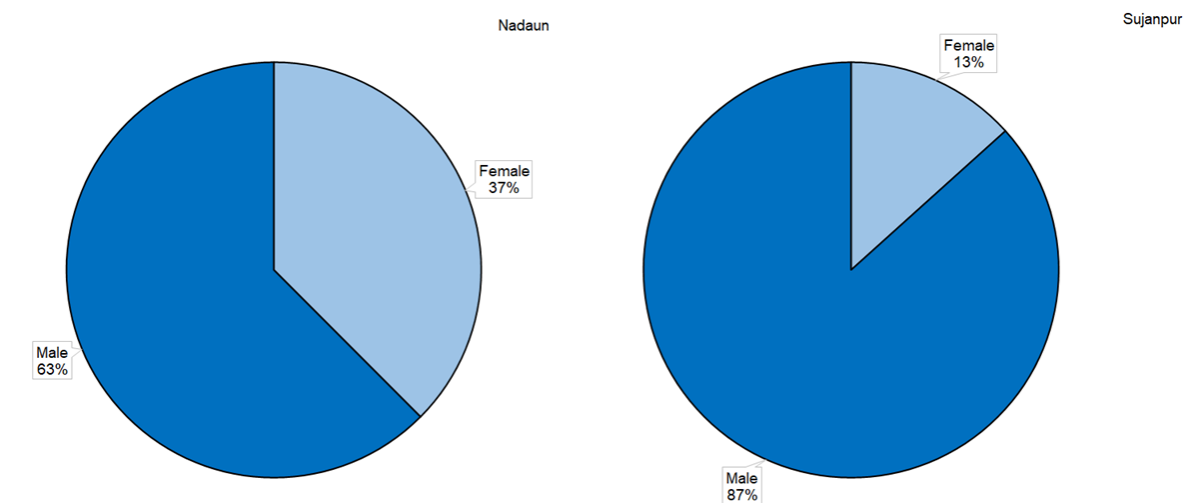

Figure S2.1: Gender distribution of survey respondents

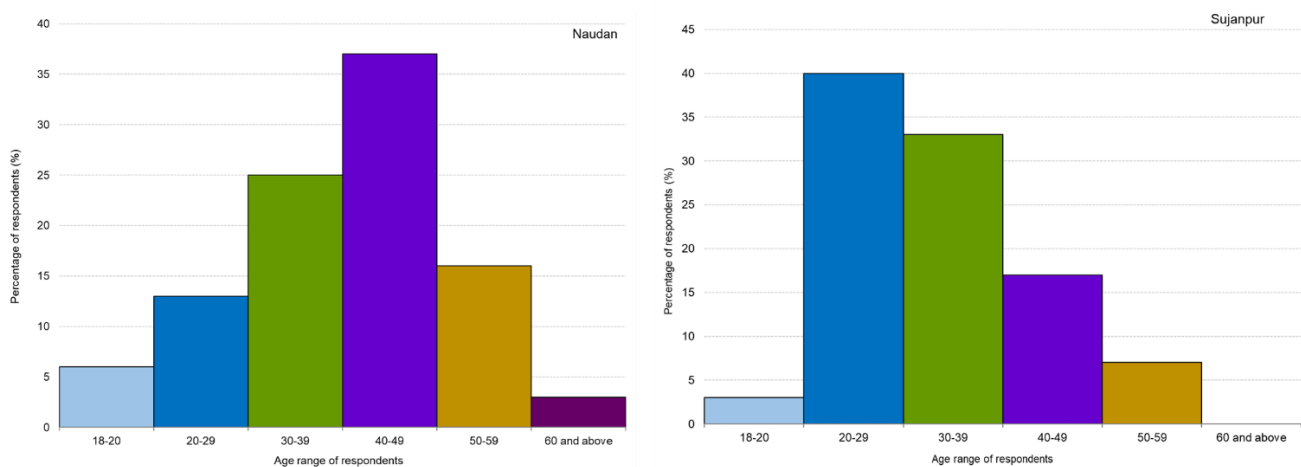

Figure S2.2: Age distribution of survey respondents

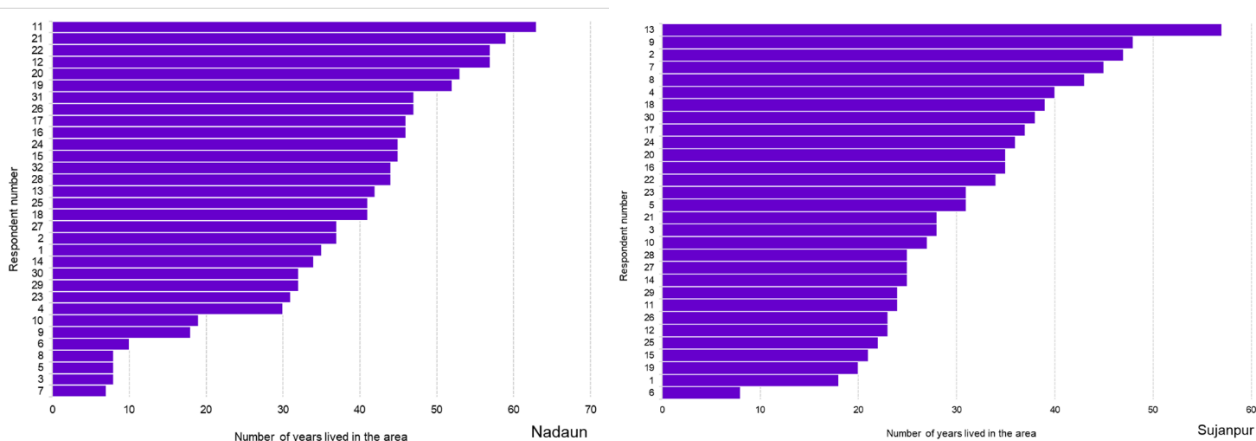

Figure S2.3: Numbers of years survey respondents have lived in the area.

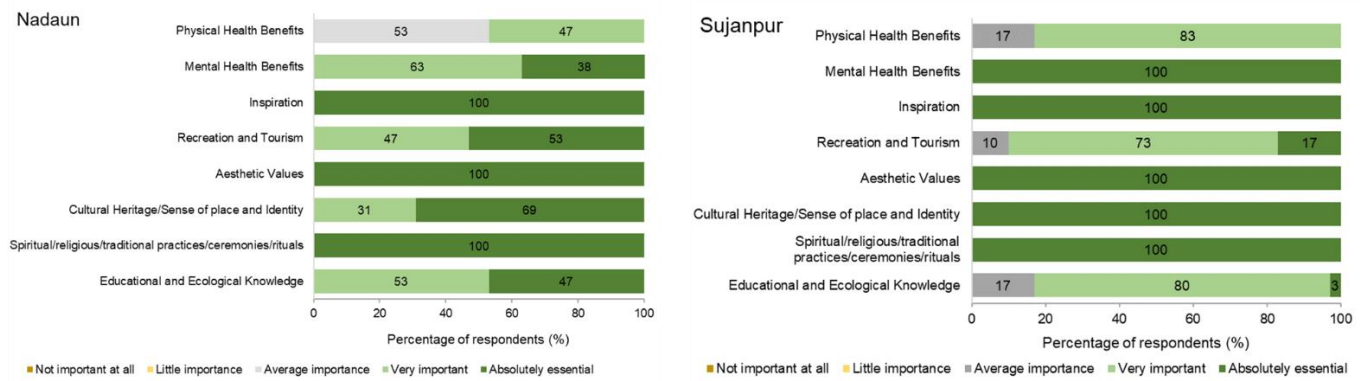

Figure S2.4: Importance of different cultural ecosystem services in the Beas River

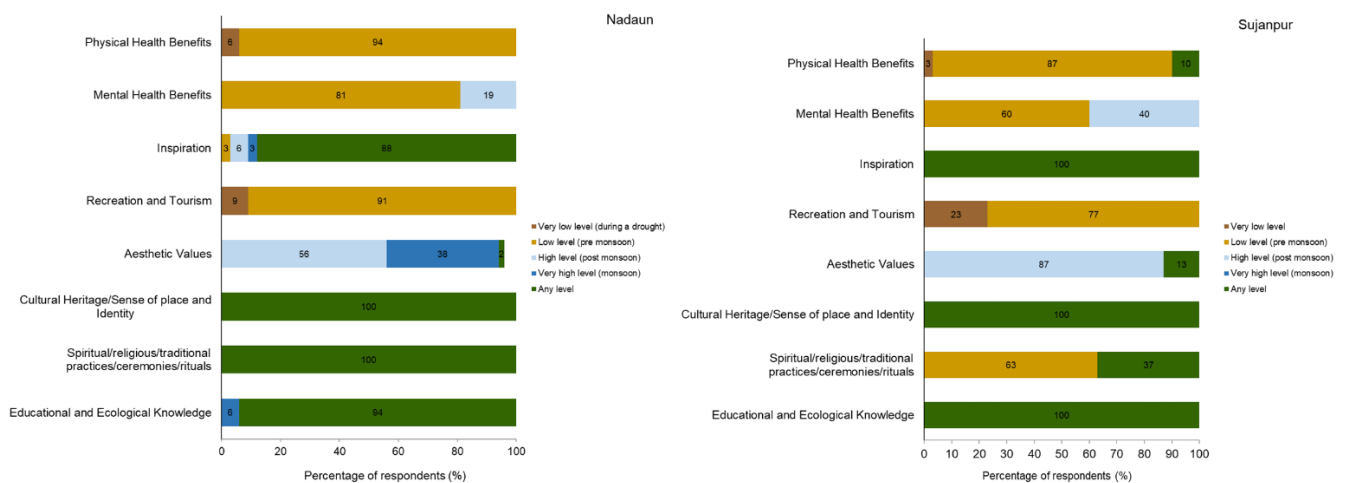

Figure S2.5: River water levels at which most cultural ecosystem services are gained

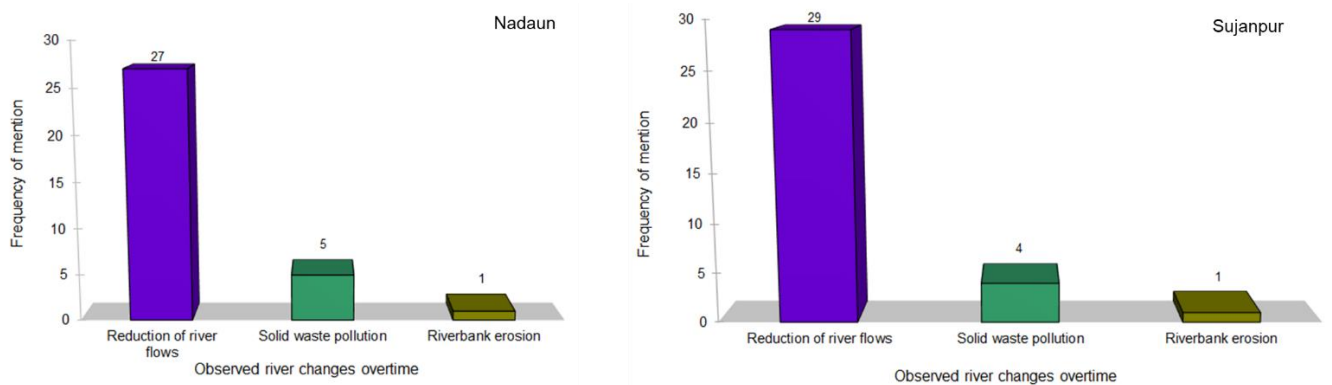

Figure S2.6: Observed changes in the Beas River overtime

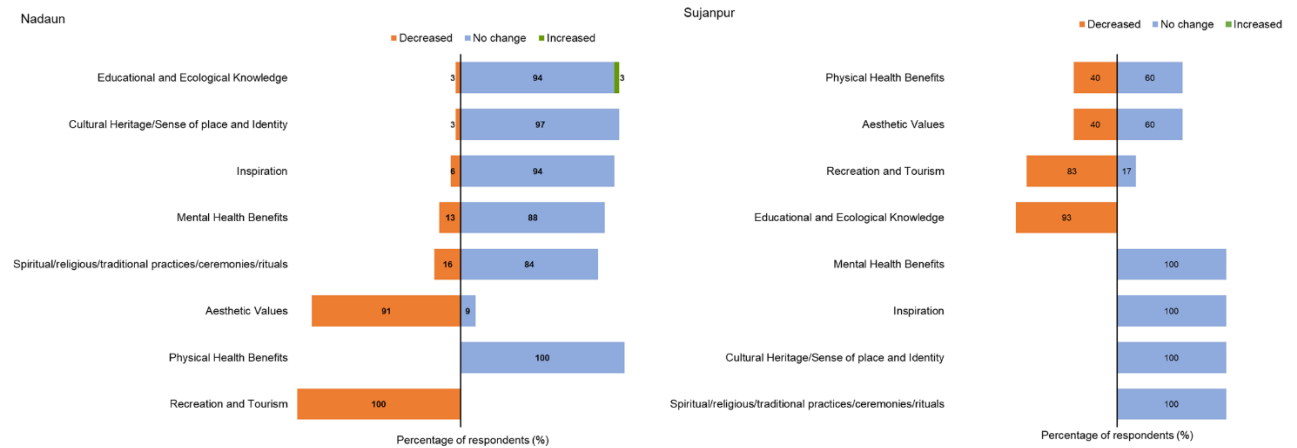

Figure S2.7: Observed changes in cultural ecosystem services in the Beas River

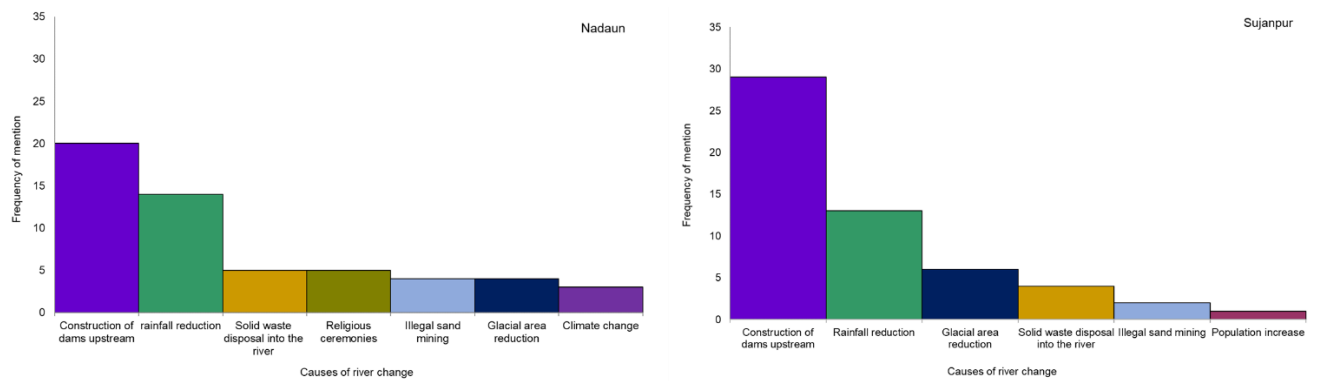

Figure S2.8: Identified causes of changes in the Beas River
